# TAKING ISSUE

## Substance Use and First-Episode Psychosis

Substance use and abuse frequently complicate a first episode of psychosis. The ways in which substance use affects the treatment of psychosis may be critical to the resolution of the first episode and may influence the course of psychosis and its treatment in the future. However, few studies have focused on substance use and treatment strategies for young adults with psychosis. In this issue, Wisdom and colleagues take an important step forward by reviewing the literature on changes in substance use after treatment for psychosis among individuals who receive and who do not receive specialized substance abuse treatment.

In addition to what the review tells us about the course of substance use after a first episode of psychosis, it shines a light on the limitations of our knowledge. For example, although many individuals stop drinking or using drugs after a first episode, probably due in part to the belief that their substance use is somehow related to or a cause of the psychosis, the longer-term implications of this belief are unclear. Would a person who abstains from substance use and who experiences another episode of psychosis reconsider his or her substance-using behavior? In addition, it is unclear whether assessment and diagnosis of substance use and abuse require tailoring for young adults with psychosis; research on assessment methods and measures in this population is lacking. Given the relatively recent development of effective treatment strategies for the general adult population with comorbid psychotic and substance use disorders, it is not surprising that the literature on young adults is even leaner. Critical information about how to identify young adults with psychosis who are most in need of additional treatment for substance abuse is not available.

Much can be learned about these topics from the extensive literature on substance use and abuse among adolescents and young adults without psychosis. Studies have explored how substance use, assessment, and diagnosis differ between the young adult and the adult populations. Researchers have defined different types of drinking and drug use—such as binge drinking—that are more prevalent among youths. Studies have also identified predictors of heavy substance use or problem use, including individual characteristics (personality factors and expectancies), family characteristics (family history of substance use and parental vigilance), and peer characteristics (peer norms and involvement in substance use). Researchers have developed and tested strategies for motivating youths to participate in substance abuse treatment and have studied the efficacy of treatment strategies, such as behavioral and family therapy. This literature will provide directions for research and will identify promising strategies for assessment and treatment of young adults who are experiencing a first episode of psychosis.—MELANIE BENNETT, PH.D., and LISA B. DIXON, M.D., M.P.H., *Department of Psychiatry, University of Maryland School of Medicine, Baltimore*

*Psychiatric Services*, established in 1950, is published monthly by the American Psychiatric Association for mental health professionals and others concerned with treatment and services for persons with mental illnesses and mental disabilities, in keeping with APA's objectives to improve care and treatment, to promote research and professional education in psychiatric and related fields, and to advance the standards of all psychiatric services and facilities.

### Editor

Howard H. Goldman, M.D., Ph.D.

### Editorial Board

David A. Adler, M.D.  
Javier I. Escobar, M.D.  
Stephen M. Goldfinger, M.D.  
Richard K. Harding, M.D.  
Grayson S. Norquist, M.D., M.S.P.H.  
Martha Sajatovic, M.D.  
Gregory E. Simon, M.D., M.P.H.  
Bradley D. Stein, M.D., Ph.D.  
Marvin S. Swartz, M.D.  
Marcia Valenstein, M.D.  
Roy C. Wilson, M.D.  
Bonnie T. Zima, M.D., M.P.H.

### Book Review Editor

Jeffrey L. Geller, M.D., M.P.H.

### Contributing Editors

Paul S. Appelbaum, M.D., *Law & Psychiatry*  
José Miguel Caldas de Almeida, M.D., and Marcela Horvitz-Lennon, M.D., M.P.H., *Mental Health Care Reforms in Latin America*  
Francine Cournois, M.D., and Stephen M. Goldfinger, M.D., *Frontline Reports*  
Lisa B. Dixon, M.D., M.P.H., and Brian Hepburn, M.D., *Public-Academic Partnerships*  
Jeffrey L. Geller, M.D., M.P.H., *Personal Accounts*  
William M. Glazer, M.D., *Best Practices*  
Amy M. Kilbourne, Ph.D., M.P.H., and Tami L. Mark, Ph.D., *Data Points*  
Matt Muijen, M.D., Ph.D., *Mental Health Care Reforms in Europe*  
Fred C. Osher, M.D., *State Mental Health Policy*  
Jules M. Ranz, M.D., and Susan M. Deakins, M.D., *Case Studies in Public-Sector Leadership*  
Steven S. Sharfstein, M.D., Haiden A. Huskamp, Ph.D., and Alison Evans Cuellar, Ph.D., *Economic Grand Rounds*

### Statistical Consultant

Deborah R. Medoff, Ph.D.

### Editorial Consultants

Norman Clemens, M.D.  
Julie M. Donohue, Ph.D.  
Robert E. Drake, M.D., Ph.D.  
Marcia Kraft Goin, M.D., Ph.D.  
Shelly F. Greenfield, M.D., M.P.H.  
M. Susan Ridgely, J.D.  
Laura Van Tosh

### Editorial Staff

Constance Grant Gartner, *Managing Editor*  
Demarie S. Jackson, *Associate Editor*  
Kathleen Stearman, *Associate Editor*  
Wendy Lieberman Taylor, *Production Manager*

### Publisher

Rebecca D. Rinehart

### American Psychiatric Association

John M. Oldham, M.D., *President*  
Dilip V. Jeste, M.D., *President-Elect*  
Roger Peele, M.D., *Secretary*  
David Fassler, M.D., *Treasurer*  
Ann Marie T. Sullivan, M.D., *Speaker, APA Assembly*  
James H. Scully, M.D., *Medical Director and CEO*
