September 2011

# PSYCHIATRIC SERVICES

A Journal of the  
American Psychiatric  
Association

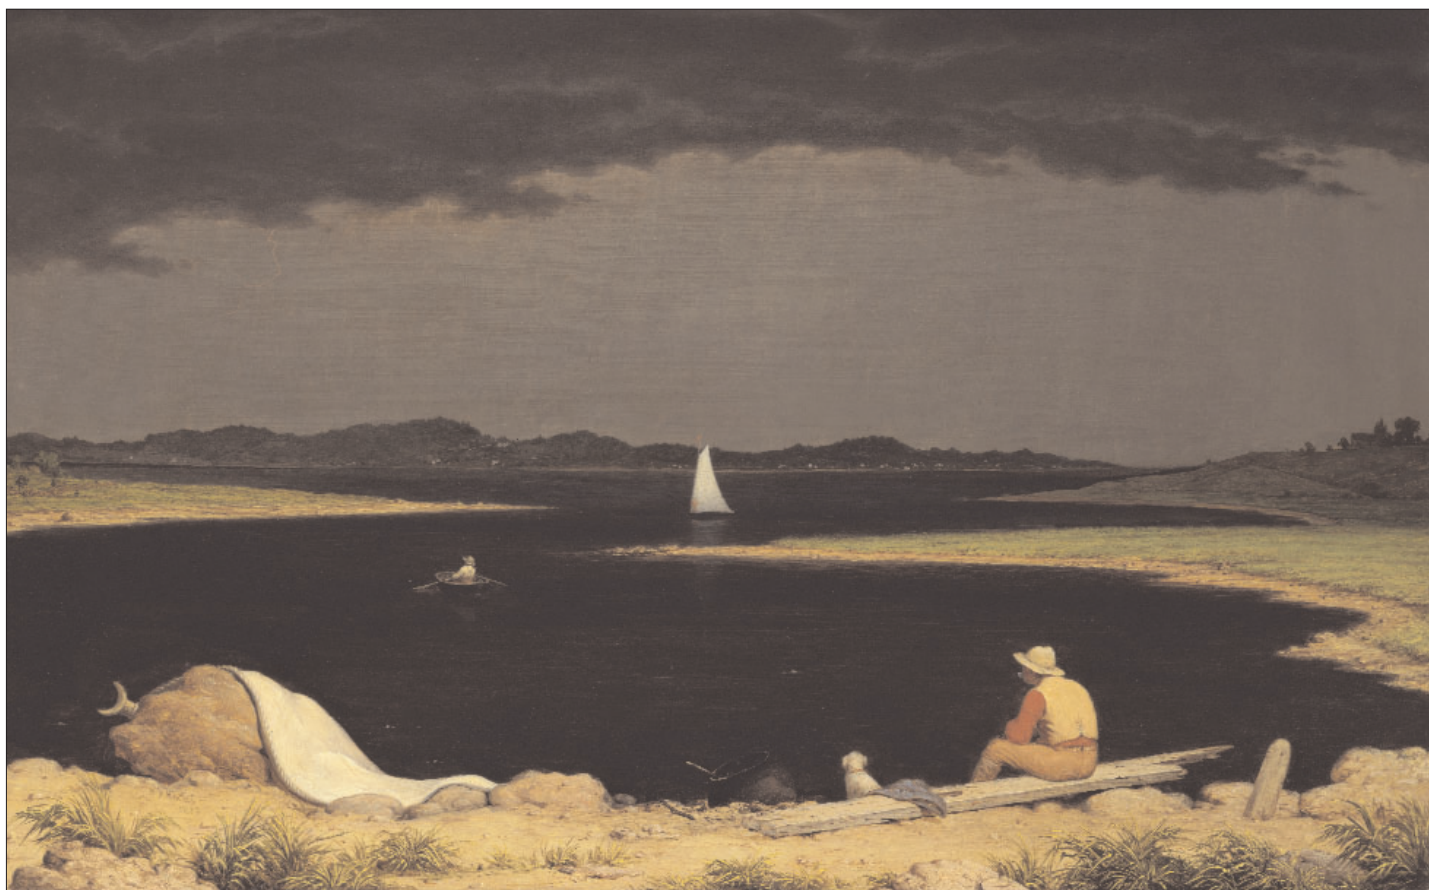

◆ Course and Treatment of  
Substance Use Disorders  
in First-Episode Psychosis

◆ Survey of Career Satisfaction  
Among U.S. Psychiatrists:  
An Analysis of National Data

◆ Treatment Disparities: Is the  
Racial-Ethnic Composition  
of the Practice a Contributor?
